# Supplementary material
Source: PubMed Central journal article supplement (PMC2743952)

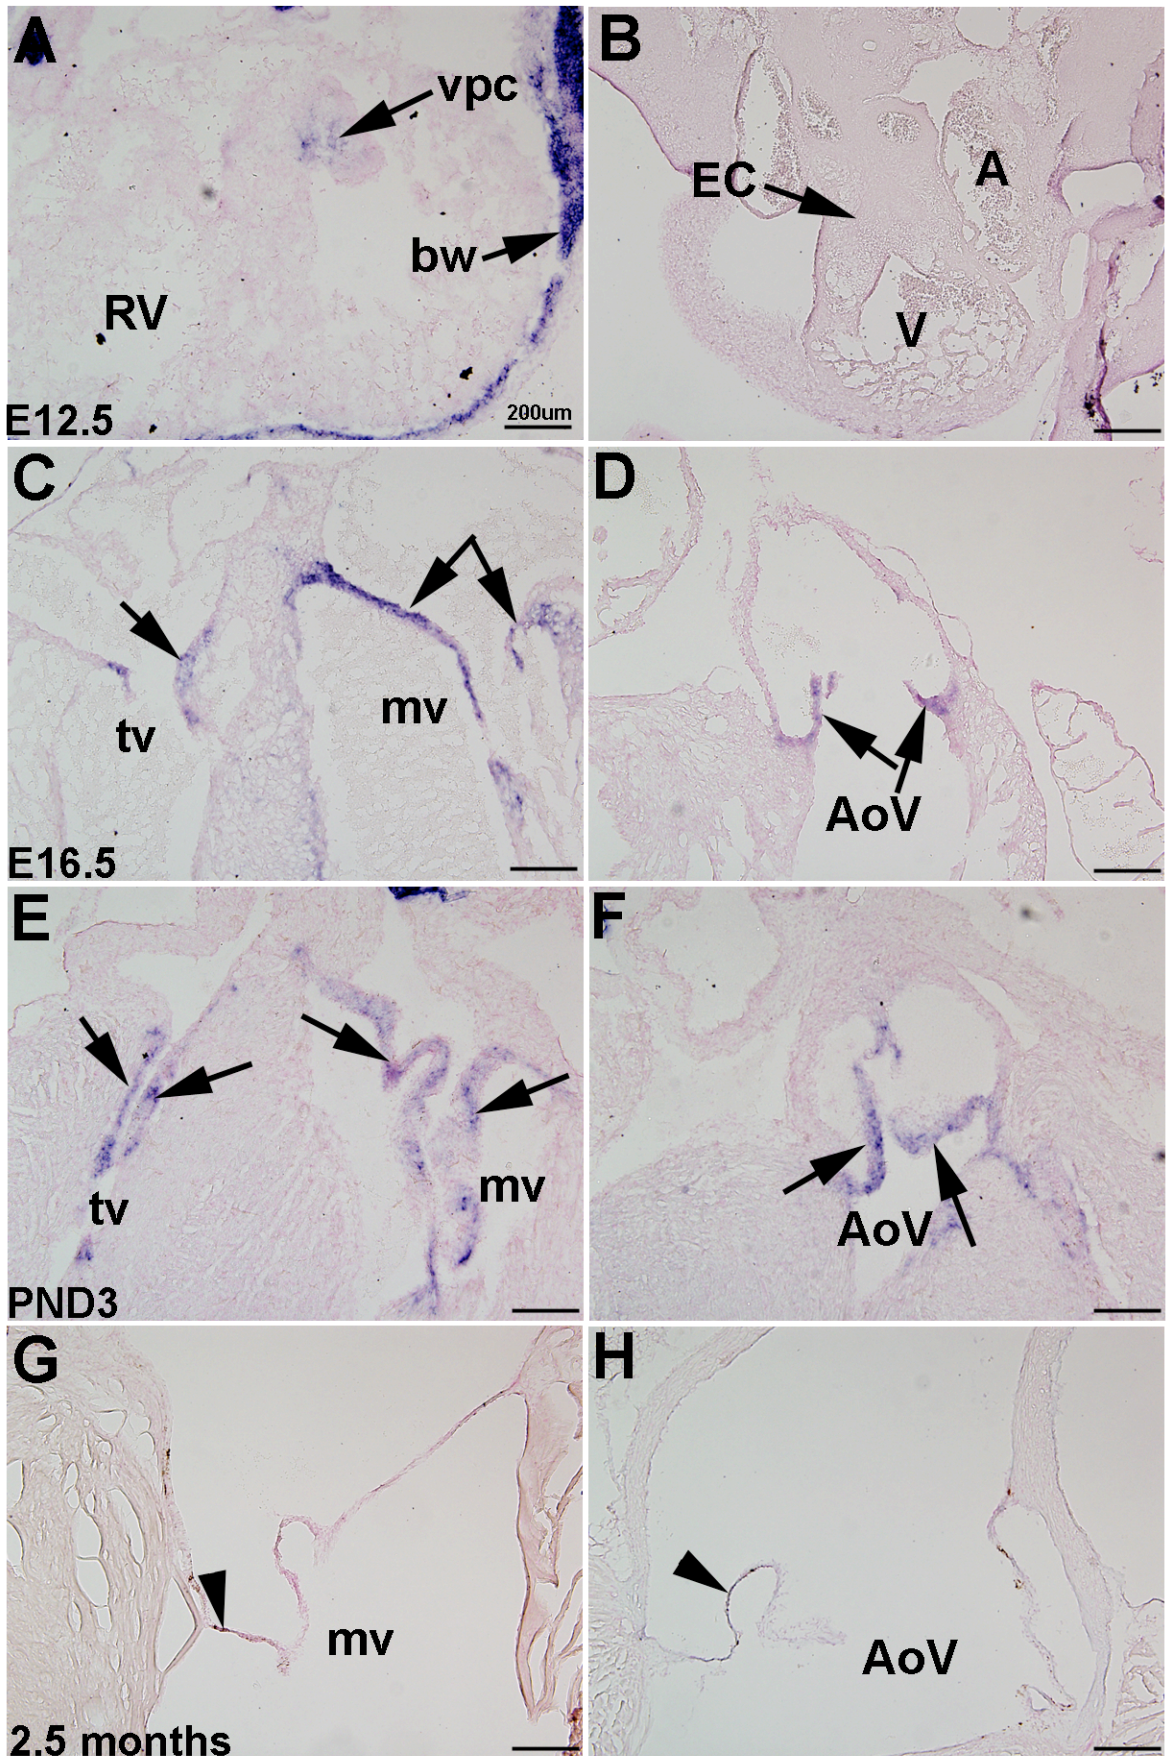

Supplementary Figure 1

Supplement: NIHMS112634-supplement-Figure_1_supplementary.pdf [file NIHMS112634-supplement-Figure_1_supplementary.pdf]
